# Supplementary material
Source: PubMed Central journal article supplement (PMC8420574)
Supplement: ADFM-31-0-s001.pdf [file ADFM-31-0-s001.pdf]

# ADVANCED FUNCTIONAL MATERIALS

## Supporting Information

for *Adv. Funct. Mater.*, DOI: 10.1002/adfm.202103477

A Broad-Spectrum Antimicrobial and Antiviral Membrane  
Inactivates SARS-CoV-2 in Minutes

*Qingsheng Liu, Yidan Zhang, Wanjun Liu, Long-Hai  
Wang, Young W. Choi, Megan Fulton, Stephanie Fuchs,  
Kaavian Shariati, Mingyu Qiao, Victorien Bernat, and  
Minglin Ma\**

## **Supplementary Information**

### **A broad-spectrum antimicrobial and antiviral membrane inactivates SARS-CoV-2 in minutes**

**Authors:** Qingsheng Liu<sup>1†</sup>, Yidan Zhang<sup>2,3†</sup>, Wanjun Liu<sup>1</sup>, Long-Hai Wang<sup>1</sup>,  
Young W. Choi<sup>4</sup>, Megan Fulton<sup>4</sup>, Stephanie Fuchs<sup>1</sup>, Kaavian Shariati<sup>1</sup>, Mingyu Qiao<sup>3</sup>,  
Victorien Bernat<sup>5</sup>, Minglin Ma<sup>1,\*</sup>

\*To whom correspondence should be addressed. Email: mm826@cornell.edu.

† These authors contributed equally to this work.

**This file includes:**

**Figure S1 to S22**

**Table S1 to S2**

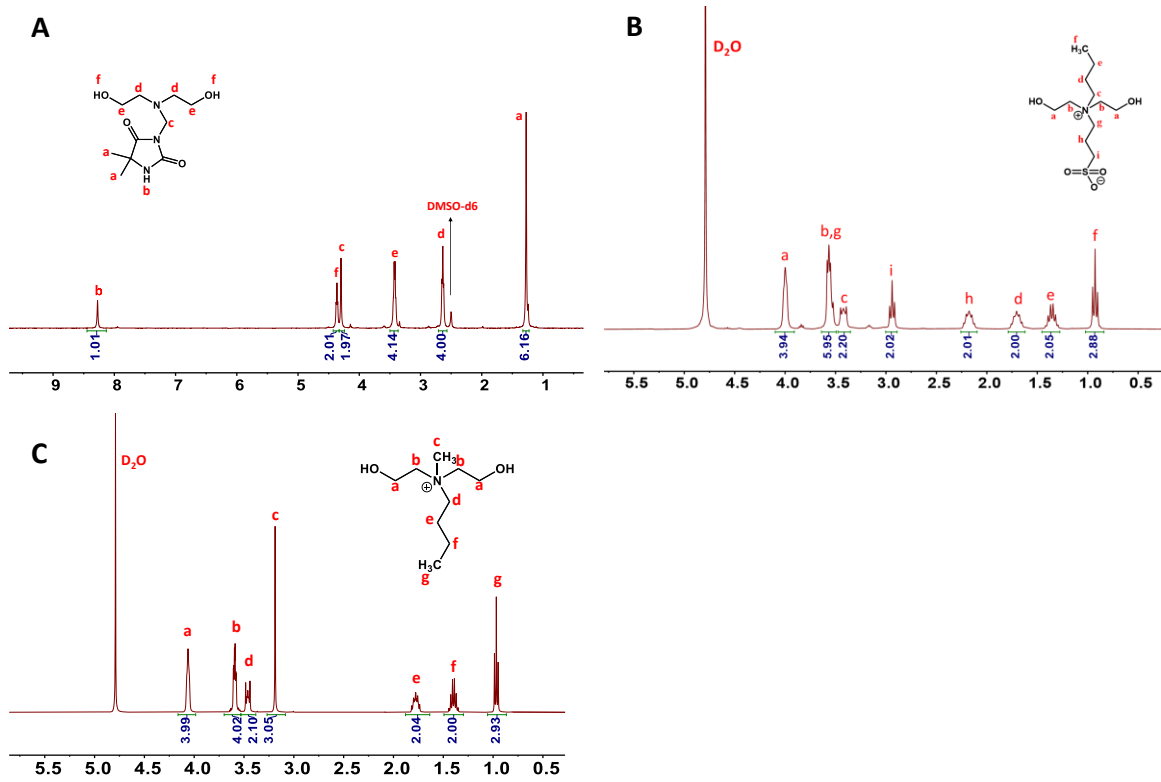

**Figure S1.**  $^1\text{H}$  NMR spectrum of (A) hydantoin-diol, (B) SB-diol, and (C)  $\text{N}^+$ -diol monomers at 400 MHz.

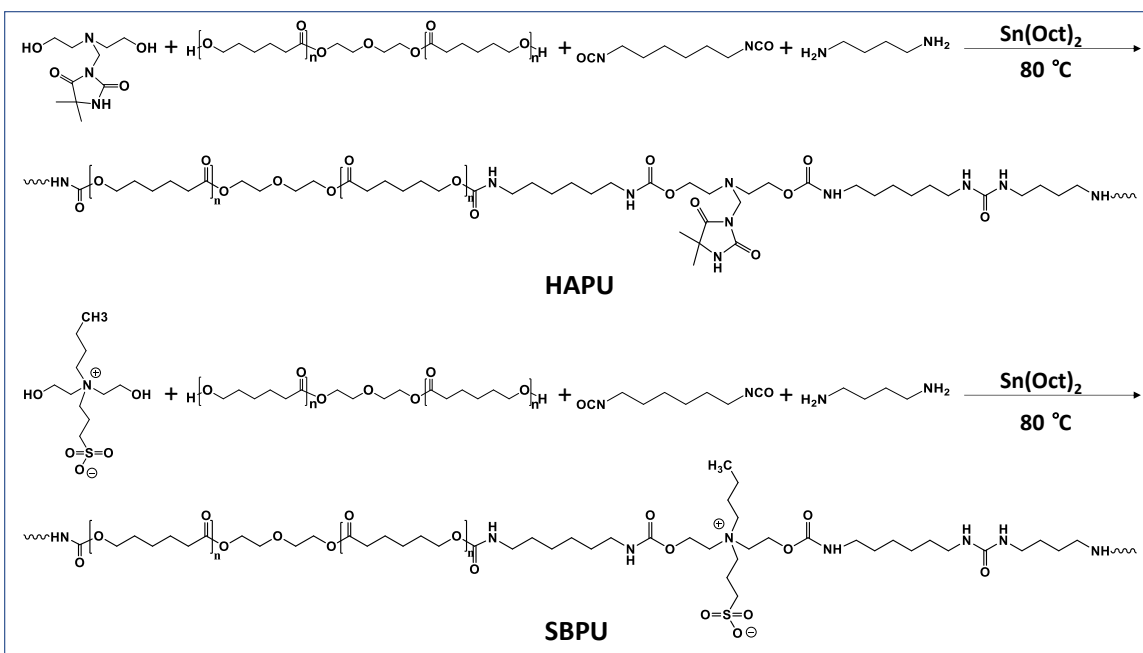

**Figure S2.** Reaction routes for synthesis of HAPU and SBPU polymers.

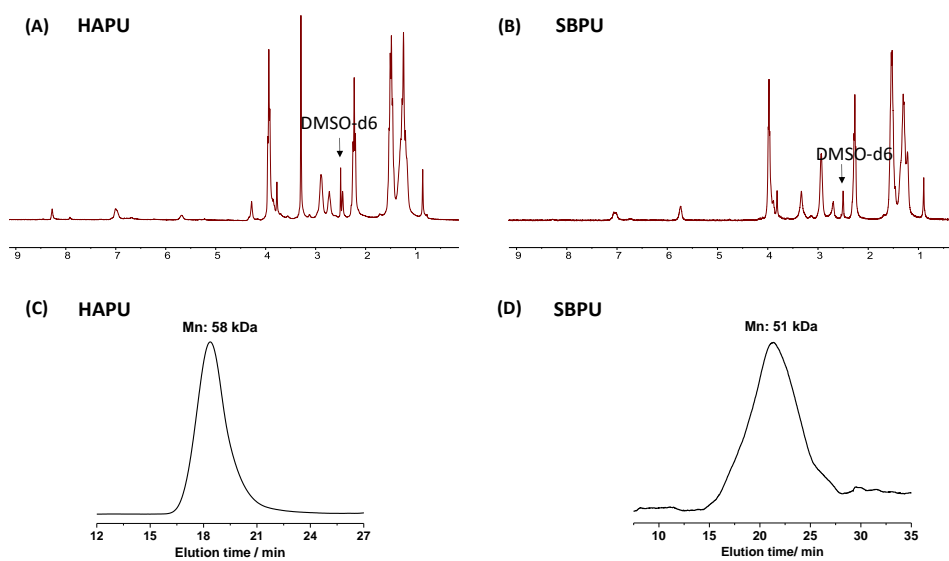

**Figure S3.** Characterization of HAPU and SBPU polymers.  $^1\text{H}$  NMR spectrum of (A) HAPU and (B) SBPU polymers; GPC analysis of (C) HAPU polymer (polydispersity: 2.0) in THF solvent and (D) SBPU polymer (polydispersity: 2.9) in DMF solvent.

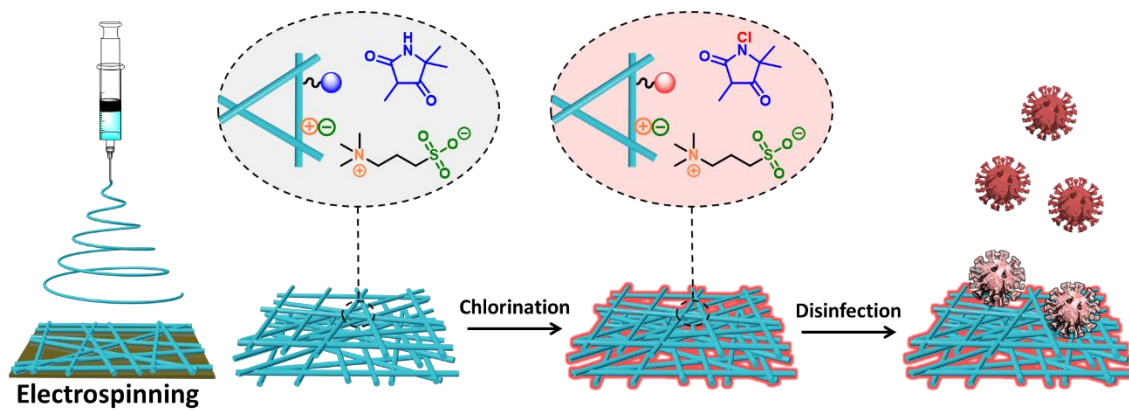

**Figure S4.** Schematic illustration for the design and fabrication of the anti-viral membrane (AVM).

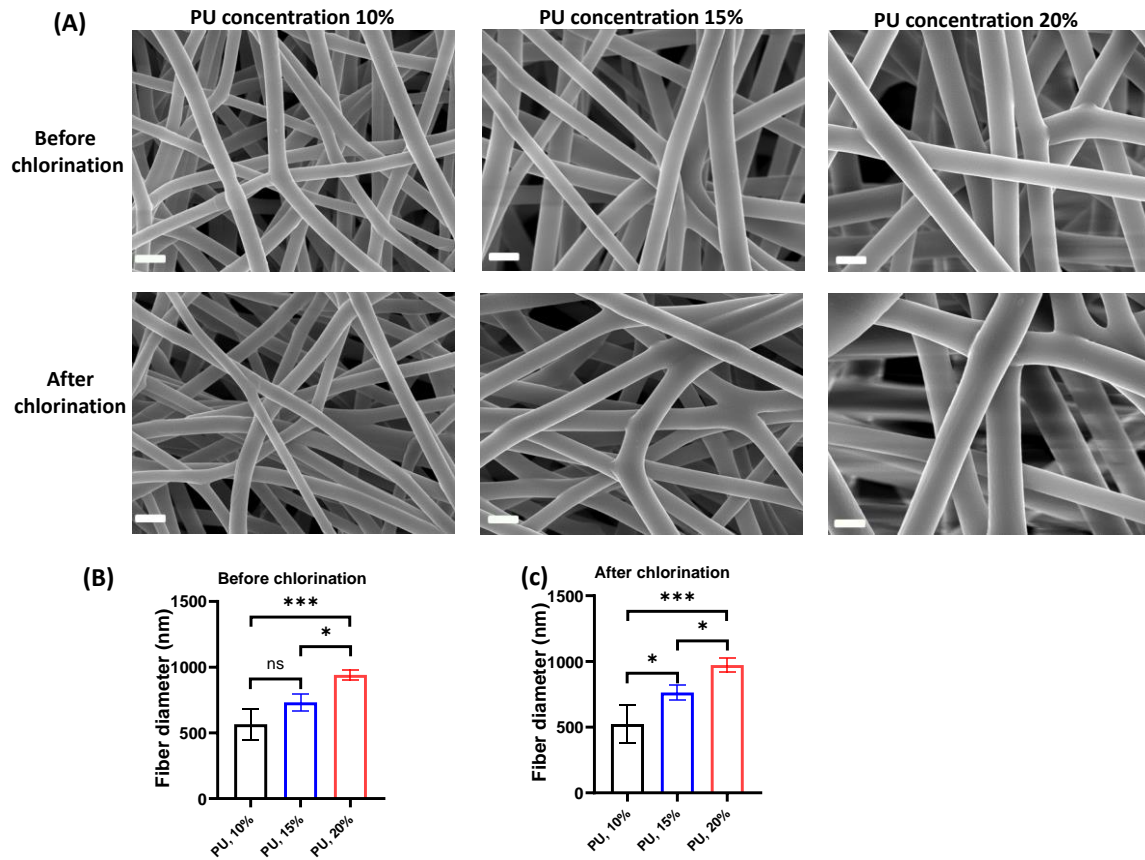

**Figure S5.** Sub-micron fibrous membranes made of HAPU and SBPU blends: different fiber sizes as a function of total polyurethane (PU) concentration. (A) SEM images of the membranes (before and after chlorination) made from different PU concentrations (from left to right: 10% (w/v or g/ml), 15%, and 20%). Scale bar, 1  $\mu\text{m}$ . (B) Fiber size of the membranes as a function of PU concentration before chlorination. (C) Fiber size of the membranes as a function of PU concentration after chlorination. Mean  $\pm$  SEM;  $n = 6$ . ns: not significant, \* $p$ -value < 0.05, \*\*\* $p$ -value < 0.001

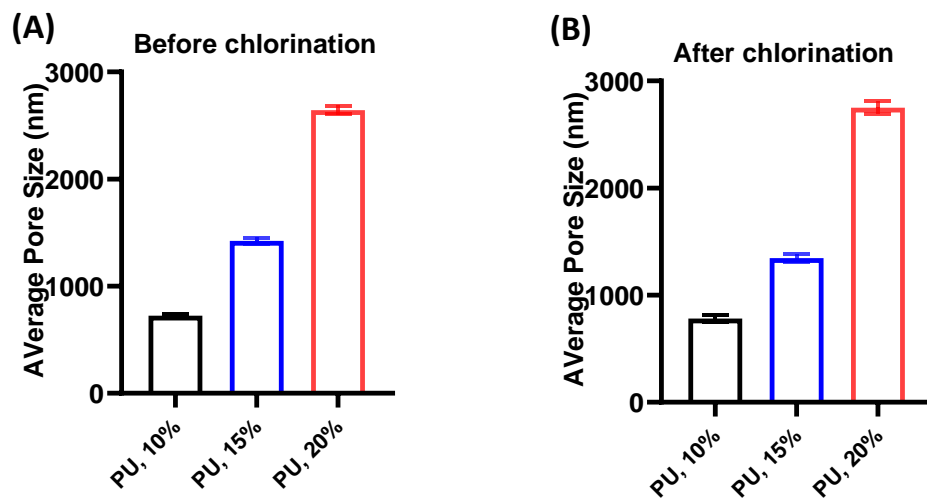

**Figure S6.** Average pore sizes as a function of total polyurethane (PU) concentration. (A) Pore size distribution of the membrane before chlorination. (B) Pore size distribution of the membrane after chlorination. Mean  $\pm$  SEM;  $n = 3$ .



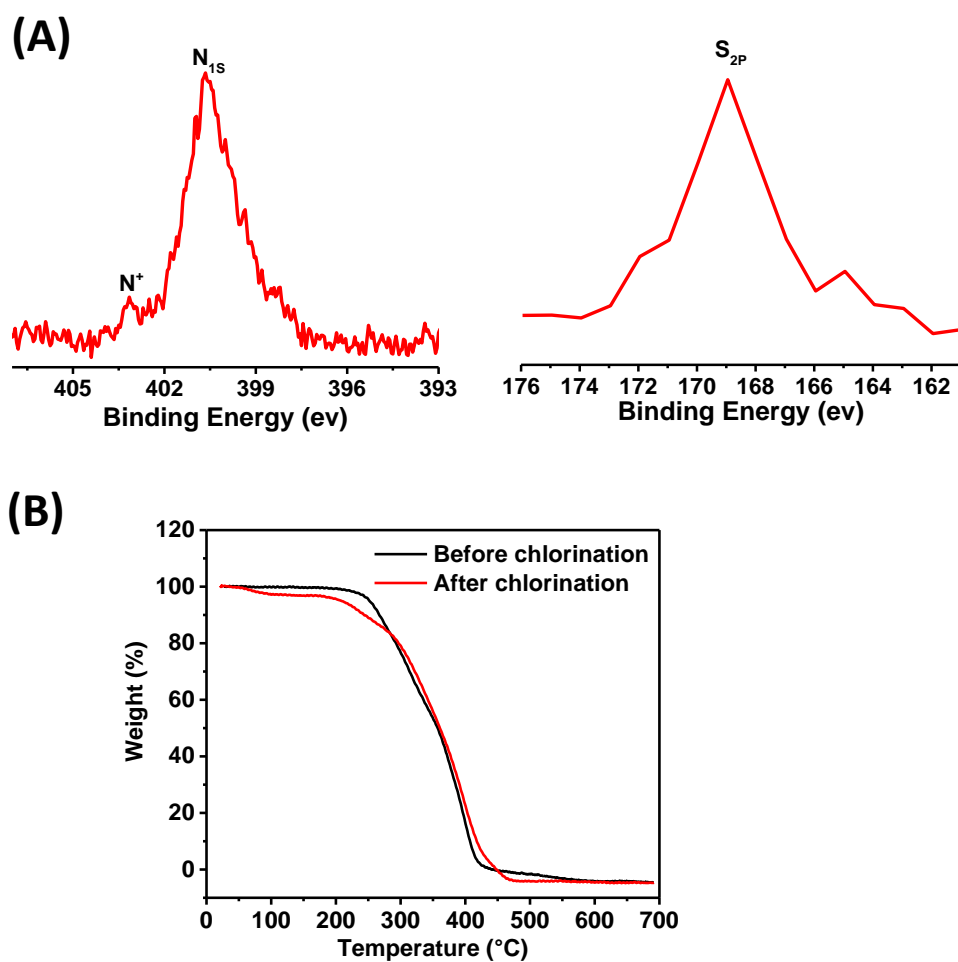

**Figure S7.** Material characterizations of AVM. (A) XPS N<sub>1s</sub> and S<sub>2p</sub> spectra of AVM. (B) Thermogravimetric analysis (TGA) profile of the membranes before and after chlorination.

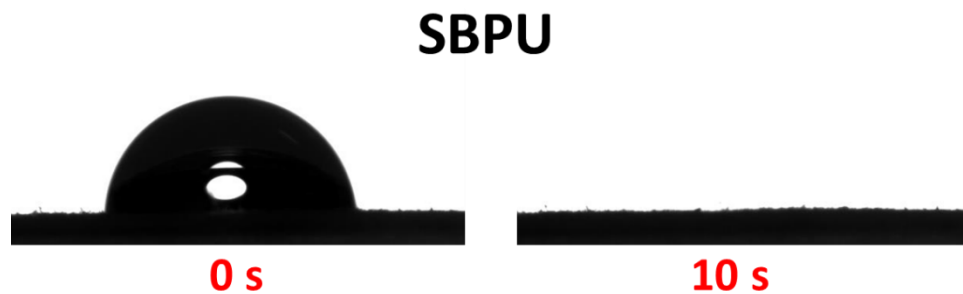

**Figure S8.** Digital photographs of water droplets on SBPU membranes.

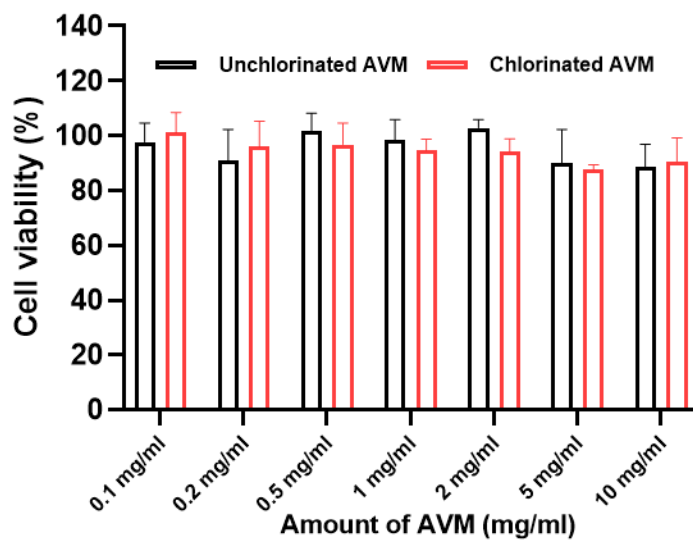

**Figure S9.** Cytotoxicity of unchlorinated and chlorinated AVM against NIH/3T3 fibroblasts determined by the MTT assay. Data are normalized to the negative control (i.e. cells cultured in the medium only) and expressed as Mean  $\pm$  SEM (n = 6).

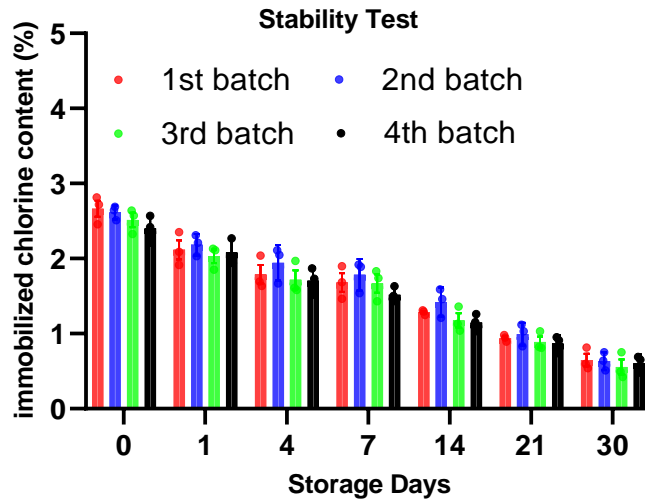

**Figure S10.** Stability of immobilized chlorine (weight percentage) on AVM made from various batches of polyurethanes under dry condition. Mean  $\pm$  SEM;  $n = 3$ .

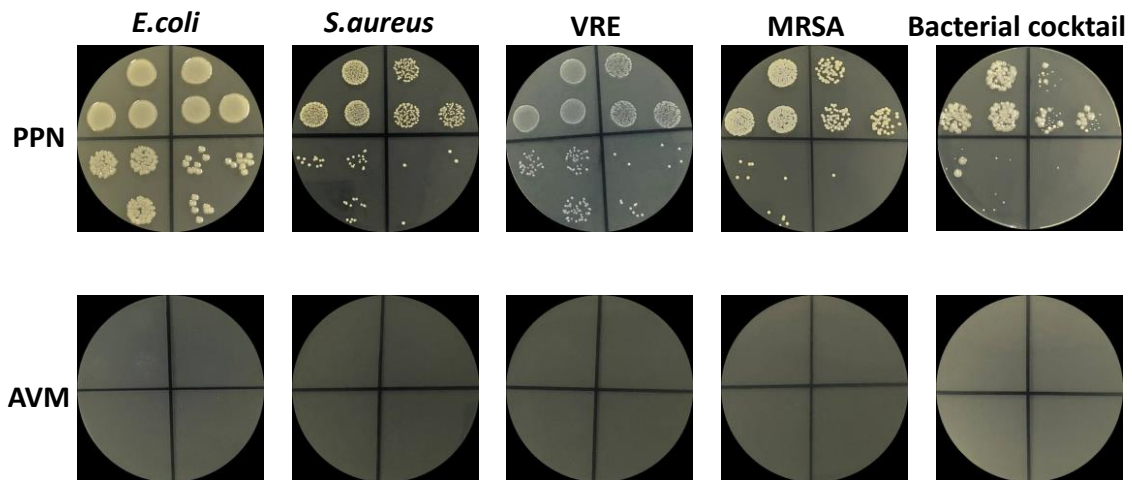

**Figure S11.** Photographs from bacterial culture plates with different bacterial strains after a 1 min exposure to PPN membrane and AVM.

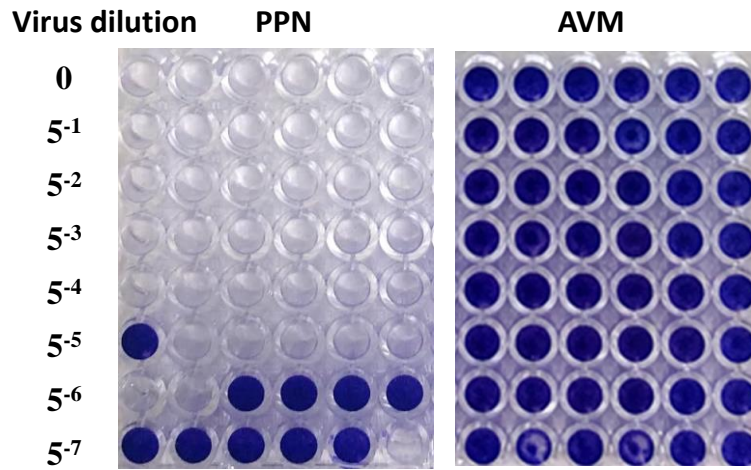

**Figure S12.** Crystal violet stained TCID<sub>50</sub> plates of AVM and PPN membrane against FCV after 2h contact. Crandell-Rees Feline Kidney (CRFK) cells were infected with FCV and stained with crystal violet for detection of CPE after 7-day incubation.

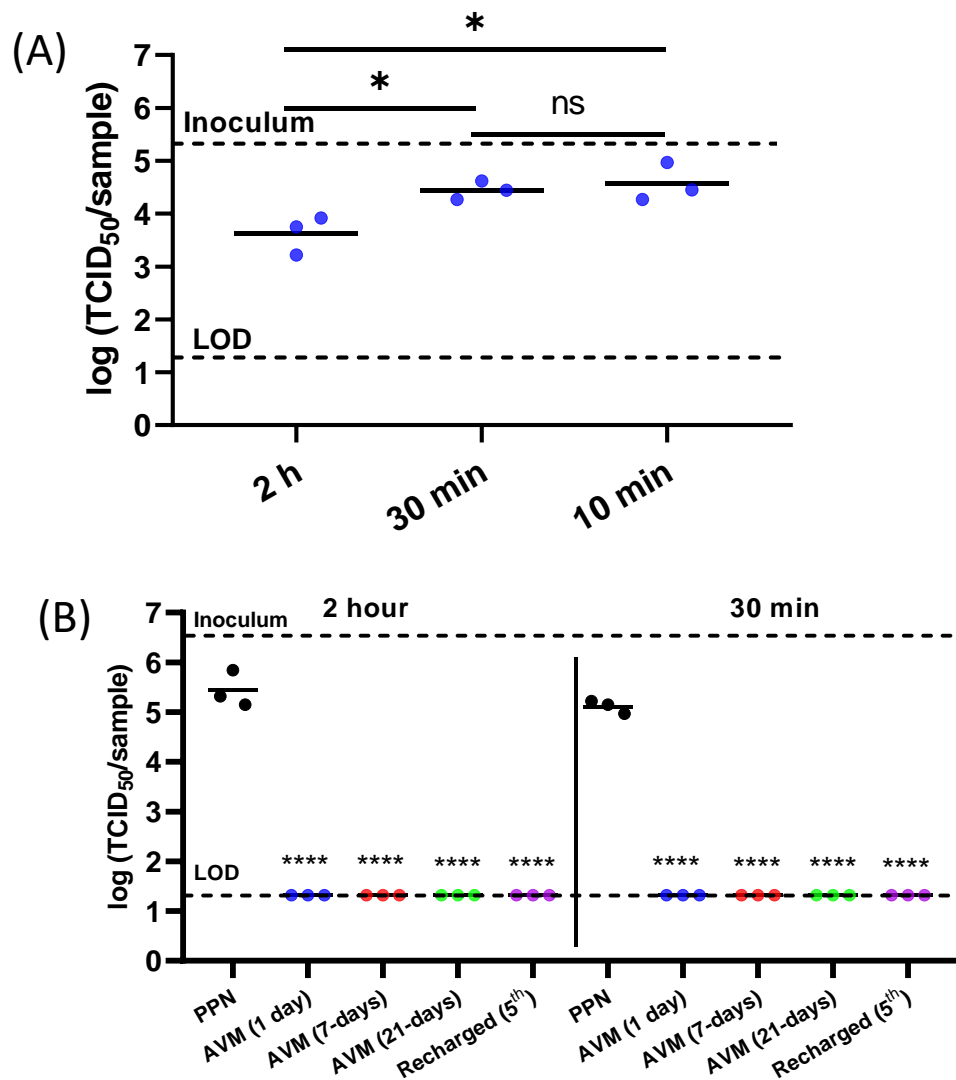

**Figure S13.** The viability of FCV on various membranes. **(A)** Viable titer of FCV on the membrane made of HAPU and SBPU before chlorination. **(B)** Viable titer of FCV on the AVM with different shelf times or recharged, after 30 min or 2 h contact. PPN membranes were used as a control. Mean  $\pm$  SEM; n = 3. ns: not significant; \* $p$ -value  $< 0.05$ ; \*\*\*\* $p$ -value  $< 0.0001$ .

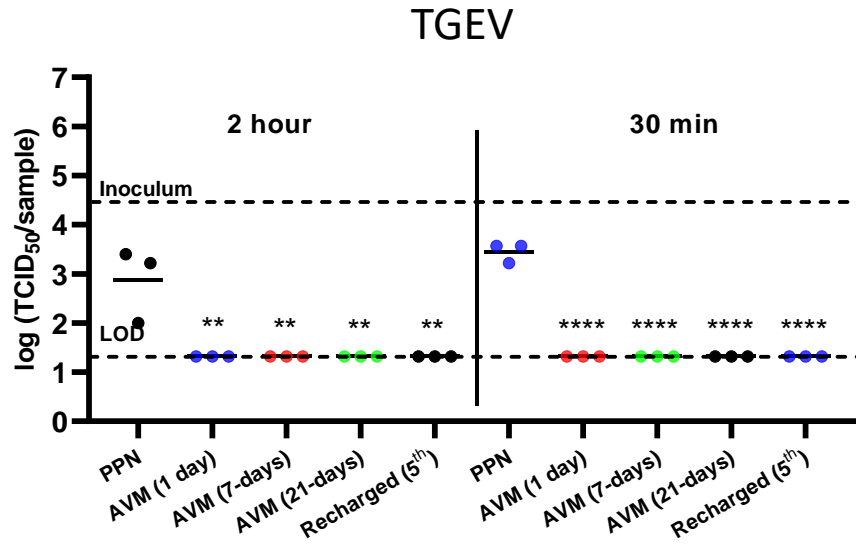

**Figure S14.** Viable titer of TGEV on the AVM with different shelf times or recharged, after 30 min or 2 h contact. PPN membranes were used as a control. n = 3 for each group. \*\**p*-value <0.01; \*\*\*\**p*-value <0.0001.

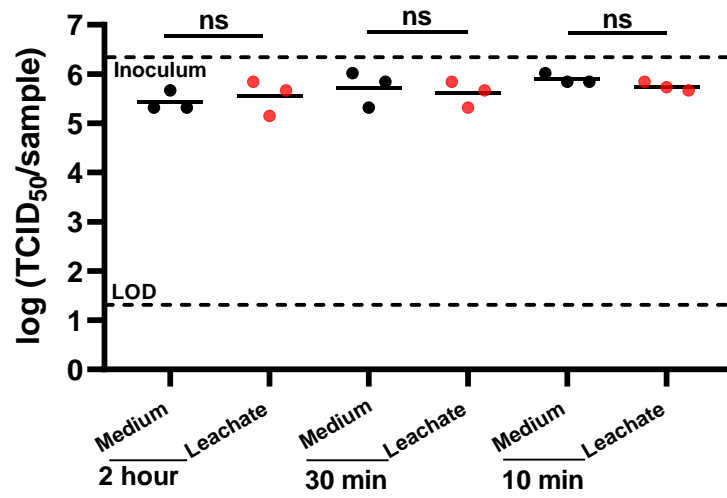

**Figure S15.** Effect of leachate from AVM on FCV viability after 10 min, 30 min or 2 h of contact. n = 3 for each group. ns: not significant.

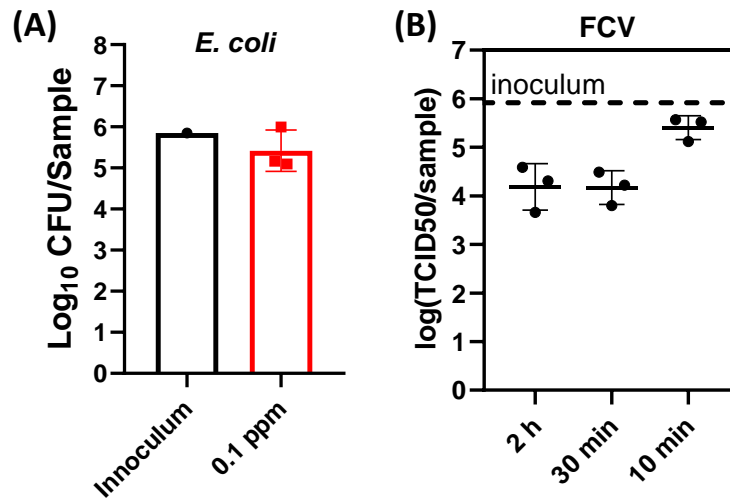

**Figure S16.** The (a) antimicrobial and (b) antiviral activities of diluted commercial bleach containing 0.1 ppm chlorine. n = 3 for each group.

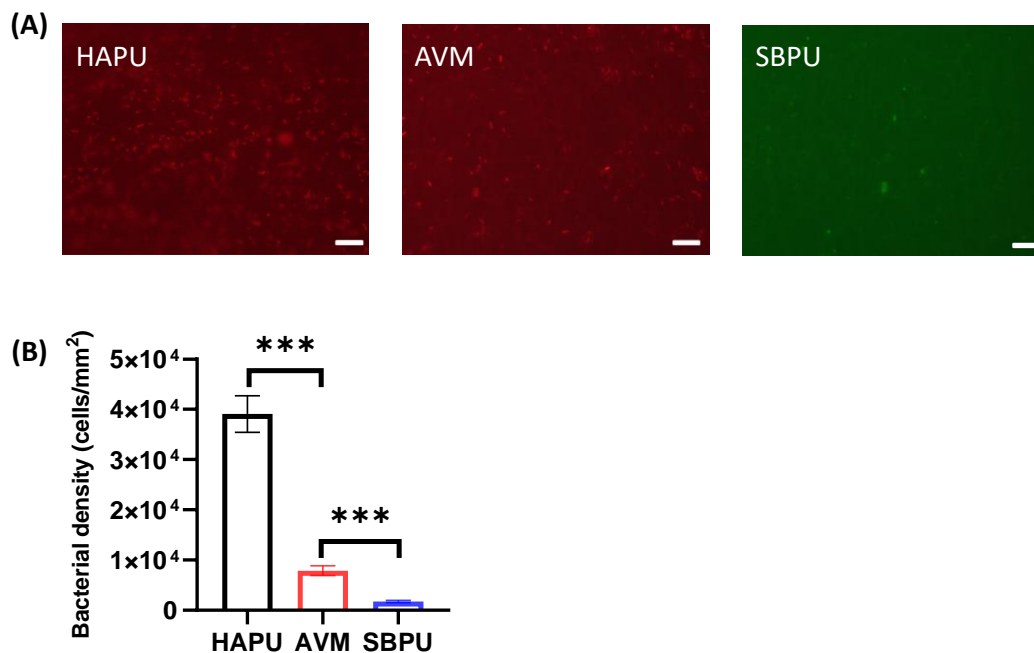

**Figure S17.** Bacterial attachment on the various membranes. (A) Representative fluorescence microscopy images of *E. coli* attached on different membranes, and (B) corresponding bacterial density accumulated on the membranes. Bar = 10  $\mu\text{m}$ . Mean  $\pm$  SEM;  $n = 3$ . \*\*\* $p$ -value  $< 0.001$ .



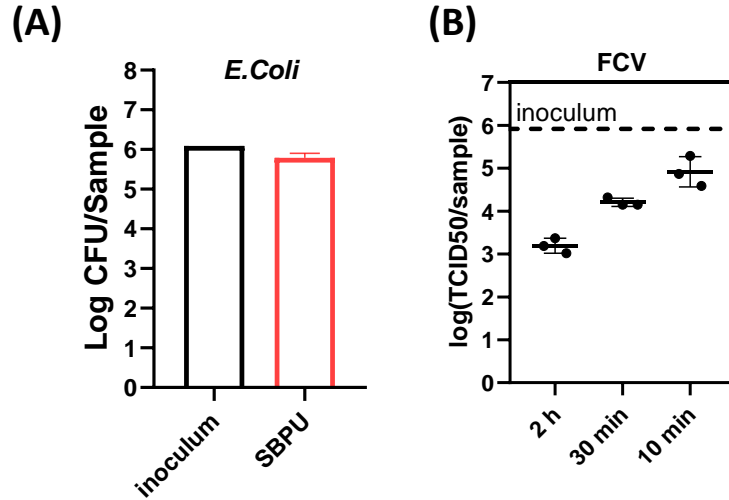

**Figure S18.** The (a) antimicrobial and (b) antiviral activities of unchlorinated SBPU membrane. n = 3 for each group.

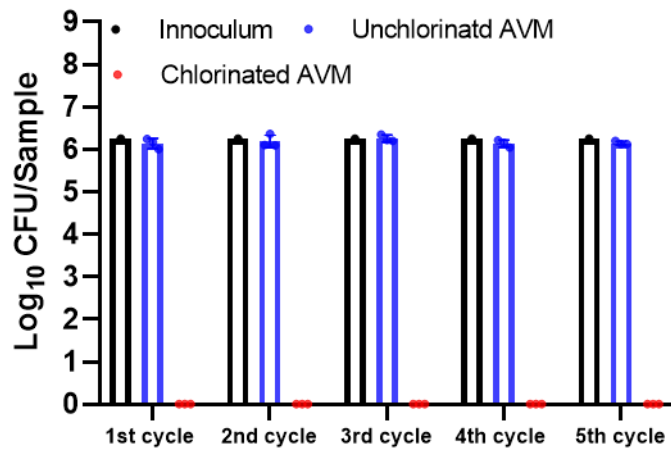

**Figure S19.** Antibacterial activity of AVM with single chlorination after repeated challenges. Mean  $\pm$  SEM; n = 3.

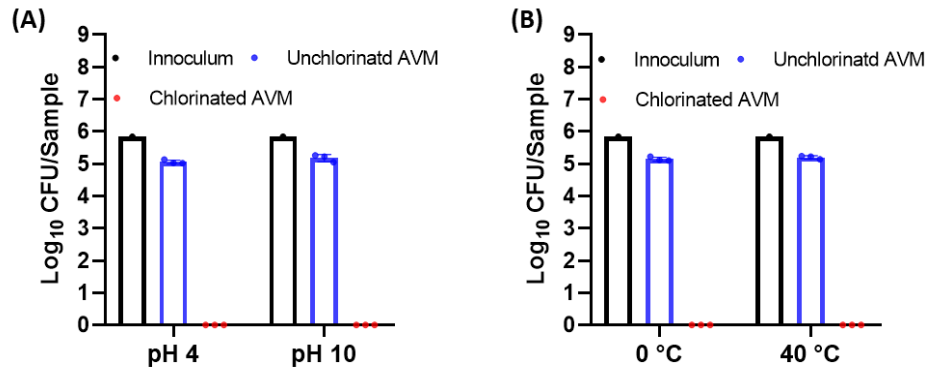

**Figure S20.** Bactericidal efficacies of AVM against *E. coli* in different (A) pH conditions after 1 day of incubation and (B) temperature conditions for 3 days of incubation. Mean  $\pm$  SEM; n = 3.

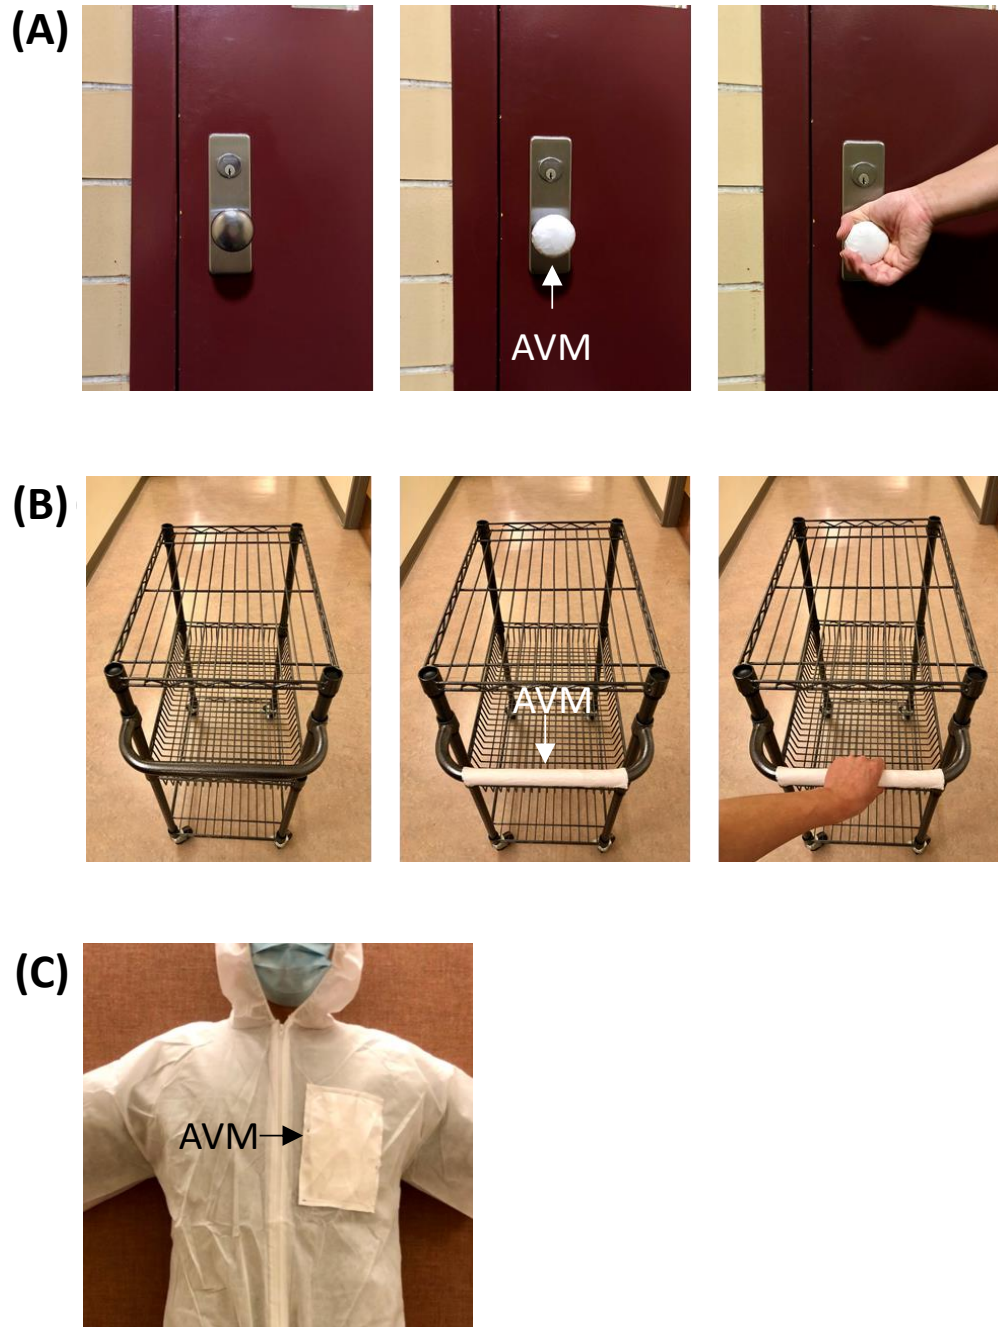

**Figure S21.** Digital photographs of (A) doorknob, (B) shopping cart handle and (C) protective suit coated with the AVM.

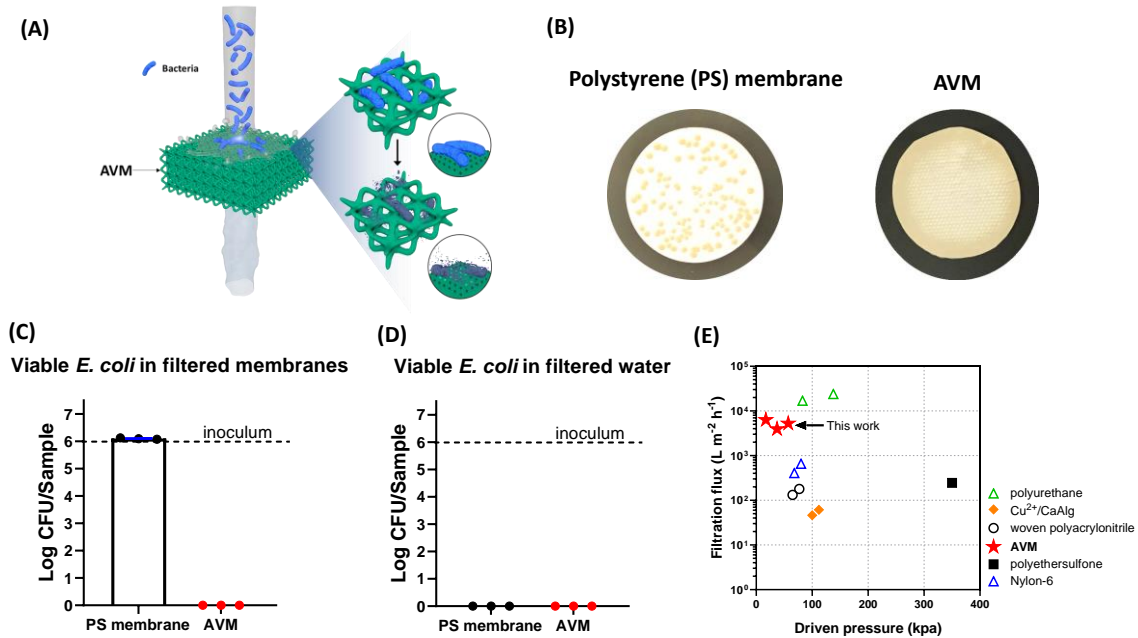

**Figure S22.** Wastewater filtration application of AVM. **(A)** Schematic demonstration of wastewater filtration process on AVM. **(B)** The culture plates of AVM and control polystyrene filter membrane after disinfecting *E. coli*-containing wastewater. **(C)** Viable *E. coli* recovered from AVM and control polystyrene filter membrane after disinfecting *E. coli*-containing wastewater. No viable *E. coli* was detected on AVM membrane whereas more than 6 log CFU/sample was detected on analytical polystyrene control filter membrane. **(D)** Viable *E. coli* recovered from the filtered water. **(E)** Comparison of filtration flux of AVM and previously reported filtration materials. The hydrophilic AVM not only effectively disinfected the microbe-contaminated water, but also showed relatively high filtration flux with a relatively low driven pressure compared to previously reported materials including hydrophobic and hydrophilic membranes.<sup>[1]</sup>

**Table S1.** Strains in cocktail of 14 clinically isolated pathogen strains from soldiers in field hospitals.

| No. | Strain                                          | Source       |
|-----|-------------------------------------------------|--------------|
| 1   | <i>Pseudomonas. aeruginosa</i>                  | Blood        |
| 2   | <i>Pseudomonas. aeruginosa</i>                  | Tissue       |
| 3   | <i>Enterobacter. cloacae</i>                    | Urine        |
| 4   | <i>Enterobacter. cloacae</i>                    | Urine        |
| 5   | <i>Acinetobacter. baumannii</i>                 | Surveillance |
| 6   | <i>Acinetobacter. baumannii</i>                 | Respirator   |
| 7   | <i>Klebsiella. pneumoniae</i>                   | Urine        |
| 8   | <i>Klebsiella. pneumoniae</i>                   | Respirator   |
| 9   | <i>Staphylococcus. aureus</i>                   | Surveillance |
| 10  | <i>Staphylococcus spp.</i> , coagulase negative | Fluid        |
| 11  | <i>Enterococcus. faecium</i>                    | Abscess      |
| 12  | <i>Enterococcus. faecium</i>                    | Wound        |
| 13  | <i>Streptococcus. pyogenes</i>                  | Blood        |
| 14  | <i>Streptococcus. pyogenes</i>                  | Blood        |

Note: The above strains were received from Walter Reed Army Institute of Research & Naval Medical Research Center.

**Table S2.** Bactericidal efficacies of AVM and PPN (control) against various bacteria in 15 or 30 min.

| Sample | Contact time | Recovered bacteria (mean log [CFU/sample]) |                  |      |      |                    |
|--------|--------------|--------------------------------------------|------------------|------|------|--------------------|
|        |              | <i>E. coli</i>                             | <i>S. aureus</i> | VRE  | MRSA | Bacterial cocktail |
| PPN    | 30 min       | 4.90                                       | 4.74             | 6.04 | 4.50 | 4.75               |
| AVM    |              | 0                                          | 0                | 0    | 0    | 0                  |
| PPN    | 15 min       | 5.40                                       | 5.24             | 6.12 | 5.24 | 5.40               |
| AVM    |              | 0                                          | 0                | 0    | 0    | 0                  |

## References

- [1] a) D. Aussawasathien, C. Teerawattananon, A. Vongachariya, *Journal of membrane science* **2008**, 315, 11; b) N. Maximous, G. Nakhla, W. Wan, *Journal of membrane Science* **2009**, 339, 93; c) H. R. Pant, H. J. Kim, M. K. Joshi, B. Pant, C. H. Park, J. I. Kim, K. Hui, C. S. Kim, *Journal of hazardous materials* **2014**, 264, 25; d) T. Bai, K. Zhao, Z. Lu, X. Liu, Z. Lin, M. Cheng, Z. Li, D. Zhu, L. Zhang, *Chinese Chemical Letters* **2021**, 32, 1051; e) F. Zhao, S. Chen, Q. Hu, G. Xue, Q. Ni, Q. Jiang, Y. Qiu, *Separation and Purification Technology* **2017**, 175, 130.
